# Supplementary material for: Natural malaria infection elicits rare but potent neutralizing antibodies to the blood-stage antigen RH5
Source: PubMed Central journal article supplement (PMC11383431; doi:10.1016/j.cell.2024.06.037), 2024-09-05
Supplement: mmc1.pdf [file mmc1.pdf]

## **Supplemental information**

### **Natural malaria infection elicits rare but potent neutralizing antibodies to the blood-stage antigen RH5**

**Lawrence T. Wang, Andrew J.R. Cooper, Brendan Farrell, Kazutoyo Miura, Ababacar Diouf, Nicole Müller-Sienerth, Cécile Crosnier, Lauren Purser, Payton J. Kirtley, Maciej Maciuszek, Jordan R. Barrett, Kirsty McHugh, Rodney Ogowang, Courtney Tucker, Shanping Li, Safiatou Doumbo, Didier Doumtabe, Chul-Woo Pyo, Jeff Skinner, Carolyn M. Nielsen, Sarah E. Silk, Kassoum Kayentao, Aissata Ongoiba, Ming Zhao, Doan C. Nguyen, F. Eun-Hyung Lee, Angela M. Minassian, Daniel E. Geraghty, Boubacar Traore, Robert A. Seder, Brandon K. Wilder, Peter D. Crompton, Gavin J. Wright, Carole A. Long, Simon J. Draper, Matthew K. Higgins, and Joshua Tan**

**Table S1. Crystallographic data collection and refinement statistics, related to Figure 6**

|                        | RH5ΔNL:R5.008               | RH5ΔNL:MAD8-151           | RH5ΔNL:MAD8-502           | RH5ΔNL:MAD10-255          | RH5ΔNL:MAD10-466          |
|------------------------|-----------------------------|---------------------------|---------------------------|---------------------------|---------------------------|
| <b>Data Collection</b> |                             |                           |                           |                           |                           |
| Space group            | P 31 2 1                    | P 1 21 1                  | P 1 21 1                  | P1 21 1                   | P 1 21 1                  |
| Cell dimensions        |                             |                           |                           |                           |                           |
| a, b, c (Å)            | 114.99, 114.99, 147.49      | 78.30, 121.38, 79.00      | 85.97, 158.01, 113.02     | 115.31, 134.52, 198.67    | 82.46, 140.41, 83.62      |
| α, β, γ (°)            | 90, 90, 120                 | 90, 90.18, 90             | 90, 94.59, 90             | 90, 93.56, 90             | 90, 112.74, 90            |
| Wavelength             | 0.9999 Å                    | 0.95374                   | 0.95374                   | 0.95374                   | 0.95374                   |
| Resolution (Å)         | 57.49 – 3.20<br>(3.42-3.20) | 79.00-1.95<br>(1.98-1.95) | 79.01-2.07<br>(2.11-2.07) | 87.45-3.15<br>(3.20-3.15) | 67.59-3.20<br>(3.26-3.20) |
| Total Observations     | 306591 (55698)              | 730651 (30772)            | 1245190 (41161)           | 739821 (34690)            | 205662 (10293)            |
| Total Unique           | 19138 (3408)                | 106577 (5404)             | 181986 (8654)             | 104997 (5215)             | 28799 (1404)              |
| R <sub>merge</sub> (%) | 49.6 (301.0)                | 25.2 (397.6)              | 12.6 (328.2)              | 19.0 (231.3)              | 55.1 (291.3)              |
| R <sub>meas</sub> (%)  | 51.4 (311.4)                | 27.3 (437.3)              | 13.6 (369.7)              | 20.5 (251.0)              | 59.4 (313.5)              |
| R <sub>pim</sub> (%)   | 13.2 (78.3)                 | 10.4 (180.2)              | 5.2 (166.4)               | 7.7 (97.0)                | 22.1 (115.4)              |
| CC <sub>1/2</sub>      | 0.986 (0.732)               | 0.993 (0.337)             | 0.997 (0.370)             | 0.996 (0.264)             | 0.952 (0.345)             |
| I/σ(I)                 | 5.2 (1.0)                   | 6.0 (0.7)                 | 7.5 (0.2)                 | 7.3 (0.4)                 | 2.3 (0.3)                 |
| Completeness (%)       | 100.00 (99.9)               | 98.5 (100.0)              | 99.7 (95.0)               | 100.0 (99.1)              | 99.3 (97.0)               |
| Multiplicity           | 16.00 (16.3)                | 6.9 (5.7)                 | 6.8 (4.8)                 | 7.0 (6.7)                 | 7.1 (7.3)                 |
| Wilson B factor        | 70.8                        | 27.9                      | 49.4                      | 102.5                     | 74.0                      |
| <b>Refinement</b>      |                             |                           |                           |                           |                           |
| Reflections            | 19053                       | 105428                    | 175452                    | 104799                    | 28644                     |
| Rwork / Rfree (%)      | 24.02/29.35                 | 23.01/25.15               | 26.87/27.91               | 24.19/26.36               | 27.19/31.67               |
| Average B factor       |                             |                           |                           |                           |                           |
| Protein (all)          | 90.4                        | 32.6                      | 72.2                      | 136.0                     | 100.89                    |
| Protein (Chain A)      | 82.4                        | 34.4                      | 75.3                      | 115.7                     | 94.53                     |
| Protein (Chain B)      | 96.2                        | 29.5                      | 61.0                      | 106.0                     | 90.31                     |
| Protein (Chain C)      | -                           | -                         | -                         | -                         | 20.07                     |
| Water                  | 74.0                        | 51.6                      | 63.6                      | n/a                       | n/a                       |
| Ligands                | 70.7                        | 37.3                      | n/a                       | n/a                       | n/a                       |
| Number of residues     |                             |                           |                           |                           |                           |
| Protein                | 516                         | 1034                      | 2038                      | 2848                      | 1383                      |
| Water                  | 6                           | 533                       | 418                       | 0                         | 0                         |
| Ligands                | 1                           | 7                         | 0                         | 0                         | 0                         |
| RMSDs                  |                             |                           |                           |                           |                           |
| Bond lengths (Å)       | 0.008                       | 0.008                     | 0.008                     | 0.009                     | 0.007                     |
| Bond angles (°)        | 0.97                        | 0.95                      | 0.98                      | 1.03                      | 0.92                      |
| Ramachandran plot      |                             |                           |                           |                           |                           |
| Favored (%)            | 92.0                        | 97.8                      | 97.9                      | 93.2                      | 92.1                      |
| Allowed (%)            | 8.0                         | 2.0                       | 2.1                       | 6.8                       | 7.9                       |
| Outliers (%)           | 0.0                         | 0.2                       | 0.0                       | 0.0                       | 0.0                       |
