# Supplementary material for: Natural malaria infection elicits rare but potent neutralizing antibodies to the blood-stage antigen RH5
Source: PubMed Central journal article supplement (PMC11383431; doi:10.1016/j.cell.2024.06.037), 2024-09-05
Supplement: mmc2.pdf [file mmc2.pdf]

**Table S2. Table of contacts between R5.008, MAD8-502, MAD10-466, MAD8-151 and MAD10-255 with RH5, related to Figure 6**

| R5.008 |         |            |          |       |         |            |               |
|--------|---------|------------|----------|-------|---------|------------|---------------|
| Chain  | Residue | Group      | Location | Chain | Residue | Group      | Interaction   |
| A      | D59     | Side chain | CDR H2   | B     | K457    | Side chain | Salt bridge   |
| A      | Y103    | Side chain | CDR H3   | B     | D440    | Side chain | H bond        |
| A      | Y104    | Side chain | CDR H3   | B     | N445    | Side chain | H bond        |
|        |         | Side chain | CDR H3   | B     | D461    | Side chain | H bond        |
|        |         | Side chain | CDR H3   | B     | R458    | Side chain | Cation- $\pi$ |
| A      | S106    | Side chain | CDR H3   | B     | R458    | Side chain | H bond        |
| A      | Q164    | Side chain | CDR L1   | B     | N349    | Side chain | H bond        |
| A      | Y169    | Side chain | CDR L1   | B     | R448    | Side chain | H bond        |
| A      | Y229    | Backbone   | CDR L3   | B     | R448    | Side chain | H bond        |
|        |         | Side chain | CDR L3   | B     | T449    | Side chain | H bond        |
|        |         | Side chain | CDR L3   | B     | N349    | Backbone   | H bond        |
| A      | T231    | Side chain | CDR L3   | B     | D453    | Side chain | H bond        |

| MAD8-502 |         |            |          |       |         |            |             |
|----------|---------|------------|----------|-------|---------|------------|-------------|
| Chain    | Residue | Group      | Location | Chain | Residue | Group      | Interaction |
| B        | T28     | Side chain | CDR H1   | A     | H365    | Side chain | H bond      |
| B        | S31     | Side chain | CDR H1   | A     | D361    | Side chain | H bond      |
|          |         | Backbone   | CDR H1   |       |         | Side chain | H bond      |
|          |         | Backbone   | CDR H1   | A     | W447    | Side chain | H bond      |
| B        | I52     | Side chain | CDR H2   |       |         |            | Hydrophobic |
| B        | I54     | Side chain | CDR H2   |       |         |            | Hydrophobic |
| B        | L55     | Side chain | CDR H2   |       |         |            | Hydrophobic |
| B        | R57     | Side chain | CDR H2   | A     | W447    | Backbone   | H bond      |
| B        | D101    | Side chain | CDR H3   | A     | Y358    | Side chain | H bond      |
|          |         | Side chain | CDR H3   | A     | R357    | Side chain | Salt bridge |
| B        | P103    | Side chain | CDR H3   |       |         |            | Hydrophobic |
| B        | F104    | Side chain | CDR H3   |       |         |            | Hydrophobic |
| B        | S164    | Backbone   | CDR L1   | A     | N347    | Side chain | H bond      |
| B        | D165    | Side chain | CDR L1   | A     | N352    | Side chain | H bond      |
|          |         |            |          | A     | Y358    | Side chain | Hydrophobic |
|          |         |            |          | A     | K443    | Side chain | Hydrophobic |
|          |         |            |          | A     | W447    | Side chain | Hydrophobic |
|          |         |            |          | A     | I446    | Side chain | Hydrophobic |
|          |         |            |          | A     | I442    | Side chain | Hydrophobic |

| MAD10-466 |         |            |          |       |         |            |               |
|-----------|---------|------------|----------|-------|---------|------------|---------------|
| Chain     | Residue | Group      | Location | Chain | Residue | Group      | Interaction   |
| B         | T28     | Side chain | CDR H1   | A     | H365    | Side chain | H bond        |
| B         | S31     | Side chain | CDR H1   | A     | D361    | Side chain | H bond        |
|           |         | Backbone   | CDR H1   | A     | D361    | Side chain | H bond        |
|           |         | Backbone   | CDR H1   | A     | R357    | Side chain | H bond        |
| B         | S31     | Backbone   | CDR H1   | A     | W447    | Side chain | H bond        |
| B         | I52     | Side chain | CDR H2   |       |         |            | Hydrophobic   |
| B         | I54     | Backbone   | CDR H2   | A     | K443    | Side chain | H bond        |
|           |         | Side chain | CDR H2   |       |         |            | Hydrophobic   |
| B         | F55     | Side chain | CDR H2   |       |         |            | Hydrophobic   |
| B         | H99     | Backbone   | CDR H3   | A     | R357    | Side chain | H bond        |
| B         | G100    | Backbone   | CDR H3   | A     | R357    | Side chain | H bond        |
| B         | Y101    | Side chain | CDR H3   | A     | D361    | Side chain | H bond        |
|           |         | Backbone   | CDR H3   | A     | N354    | Side chain | H bond        |
|           |         | Backbone   | CDR H3   |       |         |            | Hydrophobic   |
| B         | S103    | Side chain | CDR H3   | A     | N352    | Side chain | H bond        |
|           |         | Side chain | CDR H3   | A     | N354    | Side chain | H bond        |
| C         | R30     | Side chain | CDR L1   | A     | F350    | Side chain | Cation- $\pi$ |
| C         | D50     | Side chain | CDR L2   | A     | N352    | Side chain | H bond        |

|   |     |            |        |   |      |            |             |
|---|-----|------------|--------|---|------|------------|-------------|
| C | N53 | Side chain | CDR L2 | A | S197 | Side chain | H bond      |
| C | S67 | Side chain | FWR 3  | A | Y346 | Side chain | H bond      |
| C | N93 | Side chain | CDR L3 | A | W447 | Backbone   | H bond      |
|   |     |            |        | A | I442 | Side chain | Hydrophobic |
|   |     |            |        | A | I446 | Side chain | Hydrophobic |
|   |     |            |        | A | W447 | Side chain | Hydrophobic |

#### MAD8-151

| Chain | Residue | Group      | Location | Chain | Residue †   | Group      | Interaction |
|-------|---------|------------|----------|-------|-------------|------------|-------------|
| B     | S31     | Side chain | CDR H1   | A     | N334 (N285) | Side chain | H bond      |
|       |         | Side chain | CDR H1   | A     | N334 (N285) | Backbone   | H bond      |
| B     | Y32     | Side chain | CDR H1   | A     | T337 (T288) | Side chain | H bond      |
|       |         | Side chain | CDR H1   | A     | E341 (E292) | Side chain | H bond      |
| B     | Y33     | Side chain | CDR H1   | A     | D331 (D282) | Side chain | H bond      |
| B     | Y52     | Side chain | CDR H2   | A     | K327 (K278) | Side chain | H bond      |
| B     | H53     | Side chain | CDR H2   | A     | D331 (D282) | Side chain | Salt bridge |
| B     | R97     | Side chain | CDR H3   | A     | N338 (N289) | Side chain | H bond      |
| B     | V99     | Backbone   | CDR H3   | A     | N334 (N285) | Side chain | H bond      |
| B     | M101    | Backbone   | CDR H3   | A     | D331 (D282) | Side chain | H bond      |
| B     | I102    | Backbone   | CDR H3   | A     | D331 (D282) | Side chain | H bond      |
|       |         | Side chain | CDR H3   |       |             |            | Hydrophobic |
| B     | D184    | Side chain | CDR L2   | A     | K212 (K212) | Side chain | Salt bridge |
| B     | Y225    | Side chain | CDR L3   | A     | K212 (K212) | Side chain | H bond      |
|       |         |            |          | A     | F209 (F209) | Side chain | Hydrophobic |
|       |         |            |          | A     | I213 (I213) | Side chain | Hydrophobic |
|       |         |            |          | A     | A216 (A216) | Side chain | Hydrophobic |
|       |         |            |          | A     | I328 (I279) | Side chain | Hydrophobic |

#### MAD10-255

| Chain | Residue | Group      | Location | Chain | Residue | Group      | Interaction |
|-------|---------|------------|----------|-------|---------|------------|-------------|
| B     | T31     | Side chain | CDR H1   | A     | N334    | Side chain | H bond      |
|       |         | Backbone   | CDR H1   | A     | N334    | Side chain | H bond      |
|       |         | Side chain | CDR H1   | A     | K333    | Side chain | H bond      |
| B     | Y32     | Side chain | CDR H1   | A     | E341    | Side chain | H bond      |
| B     | Y33     | Side chain | CDR H1   | A     | D331    | Side chain | H bond      |
| B     | H53     | Side chain | CDR H2   | A     | D331    | Side chain | Salt bridge |
| B     | R97     | Side chain | CDR H3   | A     | N338    | Side chain | H bond      |
| B     | T99     | Backbone   | CDR H3   | A     | N334    | Side chain | H bond      |
| B     | M101    | Backbone   | CDR H3   | A     | D331    | Side chain | H bond      |
| B     | I102    | Backbone   | CDR H3   | A     | D331    | Side chain | H bond      |
|       |         | Backbone   | CDR H3   | A     | K212    | Side chain | H bond      |
|       |         | Side chain | CDR H3   |       |         |            | Hydrophobic |
| B     | D107    | Side chain | CDR H3   | A     | N338    | Side chain | H bond      |
| B     | D184    | Side chain | CDR L2   | A     | K212    | Side chain | Salt Bridge |
| B     | Y225    | Side chain | CDR L3   | A     | K212    | Side chain | H bond      |
|       |         |            |          | A     | F209    | Side chain | Hydrophobic |
|       |         |            |          | A     | I213    | Side chain | Hydrophobic |
|       |         |            |          | A     | A216    | Side chain | Hydrophobic |
|       |         |            |          | A     | I328    | Side chain | Hydrophobic |

† note that for the structure of PfrH5 bound to MAD8-151, the PDB is numbered according to the PfrH5 $\Delta$ NL numbering, as the linker replacing the deleted loop is observed. The numbers given here are those for full-length PfrH5, to match the numbering in other structures, while the numbers in parentheses are those in the PDB, which match numbering for PfrH5 $\Delta$ NL.
